# Supplementary material for: Explaining the saproxylic beetle diversity of a protected Mediterranean area
Source: Springer Nature journal article supplement (doi:10.1007/s10531-013-0456-x), 2013-02-20
Supplement: MOESM1 [file 5387468]

**Supplementary Material**

Table S1: Saproxylic beetles species abundance at each studied woodland.

| **Family** | **Species** | **Samplig site** | | | | | **Total** |
| --- | --- | --- | --- | --- | --- | --- | --- |
|  |  | Cork–oak woodland | Ash woodland | Mixed I | Mixed II | *Q. pyrenaica* woodland |  |
| **Aderidae** |  |  |  |  |  |  |  |
|  | *Aderus populneus* |  | 3 |  |  |  | 3 |
| **Anobiidae** |  |  |  |  |  |  |  |
|  | *Dorcatoma agenjoi* | 1 | 1 | 1 | 1 |  | 4 |
|  | *Dorcatoma chrysomelina* | 2 |  |  |  |  | 2 |
|  | *Mizodorcatoma dommeri* |  |  |  |  | 1 | 1 |
|  | *Oligomerus brunneus* |  | 8 | 52 | 23 | 8 | 91 |
|  | *Rhamna semen* | 3 |  |  | 2 |  | 5 |
|  | *Stagetus andalusiacus* |  | 16 | 11 | 10 | 9 | 46 |
|  | *Stagetus elongatus* |  |  | 1 |  |  | 1 |
|  | *Stagetus micoae* |  | 4 | 2 |  | 5 | 11 |
| **Biphyllidae** |  |  |  |  |  |  |  |
|  | *Diplocoelus fagi* | 3 | 8 | 3 | 1 | 2 | 17 |
| **Bostrichidae** | |  |  |  |  |  |  |
|  | *Lichenophanes numida* |  |  |  | 1 | 1 | 2 |
|  | *Scobicia chevrieri* | 18 | 2 |  |  | 1 | 21 |
| **Bothrideridae** | |  |  |  |  |  |  |
|  | *Bothrideres interstitialis* |  |  |  | 1 | 1 | 2 |
|  | *Oxylaemus cylindricus* |  |  |  |  | 23 | 23 |
| **Brentidae** |  |  |  |  |  |  |  |
| **(VU)*** | *Amorphocephala coronata* | 4 |  | 1 |  | 3 | 8 |
| **Buprestidae** | |  |  |  |  |  |  |
|  | *Acmaeodera degener* | 13 |  |  | 4 |  | 17 |
|  | *Acmaeoderella adspersula* | 1 | 2 |  |  |  | 3 |
|  | *Agrilus hastulifer* |  |  | 5 | 1 | 1 | 7 |
|  | *Anthaxia chaerodrys* |  | 2 |  |  |  | 2 |
|  | *Anthaxia millefolii polychloros* | |  |  |  | 1 | 1 |
|  | *Anthaxia salicis* | 1 |  | 1 | 2 | 4 | 8 |
|  | *Anthaxia scutellaris* | 1 |  |  |  |  | 1 |
|  | *Chrysobothris affinis* | 1 |  |  |  | 2 | 3 |
| **Carabidae** |  |  |  |  |  |  |  |
|  | *Calathus granatensis* |  | 4 | 3 | 5 | 1 | 13 |
|  | *Demetrias cyanocephalus* |  |  |  | 1 |  | 1 |
|  | *Dromius agilis* |  | 1 | 2 | 1 |  | 4 |
|  | *Lamprias cyanocephalus* | 1 |  |  | 6 |  | 7 |
|  | *Microlestes abeillei* |  |  |  | 3 | 2 | 5 |
|  | *Syntomus foveatus* | 1 |  |  | 8 |  | 9 |
|  | *Trechus obtusus* |  |  |  | 1 |  | 1 |
| **Cerambycidae** | |  |  |  |  |  |  |
|  | *Alocerus moesiacus* | 6 | 3 |  |  |  | 9 |
|  | *Callimellum angulatum* |  |  | 1 |  |  | 1 |
|  | *Cerambyx welensii* |  |  | 1 | 1 |  | 2 |
|  | *Chlorophorus ruficornis* |  | 1 |  |  |  | 1 |
|  | *Grammoptera abdominalis* | |  | 1 | 1 |  | 2 |
|  | *Grammoptera ustulata* |  |  |  |  | 1 | 1 |
|  | *Necydalis ulmi* | 1 |  |  |  |  | 1 |
|  | *Phymatodes testaceus* |  |  |  | 3 | 5 | 8 |
|  | *Prinobius myardi* |  |  |  |  | 1 | 1 |
|  | *Stenopterus ater* |  |  |  | 3 |  | 3 |
|  | *Stenurella approximans* |  | 2 |  |  |  | 2 |
|  | *Stenurella nigra* |  | 2 |  |  | 1 | 3 |
|  | *Stictoleptura fontenayi* |  |  |  |  | 1 | 1 |
|  | *Stictoleptura trisignata* | 10 | 1 |  | 1 |  | 12 |
|  | *Trichoferus pallidus* |  |  |  | 5 | 2 | 7 |
|  | *Xylotrechus arvicola* | 2 |  | 1 |  | 1 | 4 |
| **Cetoniidae** |  |  |  |  |  |  |  |
|  | *Cetonia aurataeformis* | 2 | 9 | 8 | 2 | 3 | 24 |
|  | *Potosia cuprea* |  | 1 | 1 |  | 1 | 3 |
|  | *Potosia opaca* | 11 | 2 | 1 | 1 |  | 15 |
|  | *Valgus hemipterus* |  | 2 |  |  |  | 2 |
| **Ciidae** |  |  |  |  |  |  |  |
|  | *Cis comptus* |  |  | 1 |  |  | 1 |
|  | *Cis festivus* |  |  |  |  | 1 | 1 |
|  | *Cis fusciclavis* | 1 |  |  |  |  | 1 |
|  | *Cis striatulus* |  |  |  |  | 4 | 4 |
|  | *Cis vestitus* |  |  |  |  | 1 | 1 |
|  | *Cis villosulus* |  |  |  |  | 1 | 1 |
| **Cleridae** |  |  |  |  |  |  |  |
|  | *Clerus mutillaris* |  |  |  |  | 1 | 1 |
|  | *Korynetes geniculatus* |  |  |  | 1 | 1 | 2 |
|  | *Opilo abeillei* |  | 2 |  | 2 | 1 | 5 |
|  | *Opilo domesticus* | 1 | 2 | 3 | 12 | 5 | 23 |
|  | *Thanasimus formicarius* |  |  | 1 |  |  | 1 |
| **Corylophidae** | |  |  |  |  |  |  |
|  | *Arthrolips cf. indescreta* |  |  |  | 1 |  | 1 |
|  | *Arthrolips obscura* |  | 1 |  |  |  | 1 |
|  | *Arthrolips picea* |  |  |  |  | 1 | 1 |
| **Cryptophagidae** | |  |  |  |  |  |  |
|  | *Atomaria atricapilla* |  |  |  |  | 1 | 1 |
|  | *Cryptophagus acutangulus* | |  | 1 |  |  | 1 |
|  | *Cryptophagus angustus* |  |  |  | 1 |  | 1 |
|  | *Cryptophagus aurelli* |  | 2 | 1 |  | 2 | 5 |
|  | *Cryptophagus dentatus* | 4 | 7 | 11 | 8 | 23 | 53 |
|  | *Cryptophagus labilis* |  |  | 1 | 1 |  | 2 |
|  | *Cryptophagus micaceus* | 2 | 7 | 3 | 4 | 2 | 18 |
|  | *Cryptophagus pallidus* | 6 | 5 | 19 | 14 | 13 | 57 |
|  | *Cryptophagus pseudodentatus* | |  |  |  | 1 | 1 |
|  | *Cryptophagus punctipennis* | |  | 2 | 2 | 1 | 5 |
|  | *Cryptophagus reflexus* |  |  | 3 | 4 | 6 | 13 |
|  | *Cryptophagus saginatus* |  | 2 |  |  | 4 | 6 |
|  | *Cryptophagus scanicus* | 3 | 11 | 13 | 8 | 14 | 49 |
|  | *Cryptophagus spadiceus* |  |  |  | 2 |  | 2 |
|  | *Cryptophagus uncinatus* |  |  | 1 |  | 1 | 2 |
|  | *Micrambe micoae* |  | 1 |  |  |  | 1 |
|  | *Micrambe ulicis* |  | 1 |  |  |  | 1 |
| **Curculionidae** | |  |  |  |  |  |  |
|  | *Brachytemnus porcatus* |  | 11 |  |  |  | 11 |
|  | *Camptorhinus simplex* | 1 |  | 1 | 3 | 8 | 13 |
|  | *Camptorhinus statua* | 3 |  |  | 1 | 8 | 12 |
|  | *Choerorhinus squalidus* |  |  |  |  | 1 | 1 |
|  | *Gasterocercus hispanicus* |  |  |  | 1 | 2 | 3 |
|  | *Mecinus pyraster* |  |  | 1 |  |  | 1 |
|  | *Melicius cylindrus* |  | 3 | 2 | 1 |  | 6 |
|  | *Melicius gracilis* | 1 | 2 |  | 1 | 2 | 6 |
|  | *Rhyncolus punctatulus* |  | 19 | 14 | 5 |  | 38 |
|  | *Rhyncolus reflexus* | 1 | 8 | 3 | 4 |  | 16 |
|  | *Stenoscelis submuricata* |  | 19 | 19 |  |  | 38 |
|  | *Stereonychus fraxini* |  | 5 |  |  |  | 5 |
| **Curculionidae (Scolytinae)** | |  |  |  |  |  |  |
|  | *Dryocoetes villosus* | 1 | 1 | 3 |  | 7 | 12 |
|  | *Hylesinus crenatus* |  | 1 | 2 |  |  | 3 |
|  | *Hylesinus fraxini* |  | 21 | 23 | 5 |  | 49 |
|  | *Hylurgus ligniperda* |  |  |  | 1 |  | 1 |
|  | *Orthotomicus erosus* | 1 |  |  |  |  | 1 |
|  | *Xyleborinus saxesenii* | 3 | 3 | 3 | 37 | 16 | 62 |
|  | *Xyleborus dryographus* | 11 | 1 | 31 | 11 | 26 | 80 |
|  | *Xyleborus monographus* | 81 | 7 | 34 | 66 | 99 | 287 |
|  | *Xyleborus saxesenii* | 4 | 5 | 7 | 7 | 4 | 27 |
| **Dasytidae** |  |  |  |  |  |  |  |
|  | *Aplocnemus brevis* | 27 | 5 | 5 | 6 | 3 | 46 |
|  | *Aplocnemus consobrinus* |  | 4 |  | 1 |  | 5 |
|  | *Aplocnemus limbipennis* | 5 | 4 | 3 | 6 | 3 | 21 |
|  | *Danacea lata* |  | 3 |  |  |  | 3 |
|  | *Danacea pici* |  | 2 |  |  |  | 2 |
|  | *Dasytes nigropilosus* |  |  | 1 |  |  | 1 |
|  | *Dasytes oculatus* | 4 |  |  | 1 |  | 5 |
|  | *Dasytes pauperculus* | 1 | 2 | 22 | 43 | 52 | 120 |
|  | *Dasytes terminalis* | 2 | 4 |  | 3 | 2 | 11 |
|  | *Mauroania bourgeoisi* | 5 | 16 | 60 | 40 | 80 | 201 |
|  | *Psilothrix illustris* |  | 12 |  | 5 | 2 | 19 |
| **Dermestidae** | |  |  |  |  |  |  |
|  | *Anthrenus angustefasciatus* | 13 | 1 | 2 | 6 |  | 22 |
|  | *Anthrenus festivus* | 41 | 29 | 148 | 69 | 76 | 363 |
|  | *Anthrenus flavipes* | 2 |  |  |  |  | 2 |
|  | *Anthrenus minutus* |  | 1 |  | 1 |  | 2 |
|  | *Anthrenus pimpinellae* |  |  | 8 |  |  | 8 |
|  | *Anthrenus scrophulariae* |  |  |  | 1 |  | 1 |
|  | *Attagenus incognitus* | 7 | 5 | 10 | 16 | 8 | 46 |
|  | *Attagenus schaefferi* | 2 |  | 10 |  |  | 12 |
|  | *Attagenus trifasciatus* | 2 | 175 | 2 | 10 |  | 189 |
|  | *Dermestes bicolor* | 1 |  |  |  |  | 1 |
|  | *Globicornis nigripes* |  |  | 1 | 3 |  | 4 |
|  | *Orphilus niger* |  |  | 6 | 3 | 7 | 16 |
|  | *Trogoderma versicolor* |  | 2 |  |  | 3 | 5 |
| **Dynastidae** |  |  |  |  |  |  |  |
|  | *Oryctes nasicornis* |  |  | 1 | 1 |  | 2 |
| **Elateridae** |  |  |  |  |  |  |  |
|  | *Ampedus aurilegulus* |  | 26 | 17 | 18 | 22 | 83 |
|  | *Ampedus talamellii* | 1 |  |  |  | 1 | 2 |
|  | *Ectamenogonus montandoni* | |  | 1 |  |  | 1 |
|  | *Elater ferrugineus* |  |  | 4 | 1 |  | 5 |
|  | *Elathous platiai* |  | 3 |  |  |  | 3 |
| **(VU)*** | *Ischnodes sanguinicollis* |  | 3 | 8 | 8 | 2 | 21 |
|  | *Lacon punctatus* | 8 | 7 | 10 | 5 | 9 | 39 |
|  | *Megapenthes lugens* |  | 8 | 7 | 1 | 1 | 17 |
| **(EN)*** | *Podeonius acuticornis* |  |  |  |  | 3 | 3 |
|  | *Procraerus tibialis* | 4 | 25 | 39 | 3 | 2 | 73 |
| **Endomychidae** | |  |  |  |  |  |  |
|  | *Symbiotes gibberosus* |  |  | 1 | 2 | 1 | 4 |
| **Eucinetidae** | |  |  |  |  |  |  |
|  | *Eucinetus meridionalis* |  |  |  | 1 |  | 1 |
| **Histeridae** |  |  |  |  |  |  |  |
|  | *Abraeus perpusillus* |  |  | 2 |  | 1 | 3 |
|  | *Atholus corvinus* |  |  | 1 |  | 1 | 2 |
|  | *Carcinops pumilio* |  |  | 3 |  |  | 3 |
|  | *Cylister elongatus* |  | 1 |  |  |  | 1 |
|  | *Eubrachium hispidulum* |  |  |  |  | 1 | 1 |
|  | *Gnathoncus communis* | 6 | 3 | 4 | 3 | 1 | 17 |
|  | *Gnathoncus nannetensis* | 7 | 4 | 6 | 10 | 2 | 29 |
|  | *Gnathoncus rotundatus* | 14 | 1 | 2 | 1 | 1 | 19 |
|  | *Kissister minimus* |  |  |  | 3 |  | 3 |
|  | *Margarinotus merdarius* | 19 | 5 | 2 | 3 | 1 | 30 |
|  | *Merohister ariasi* | 2 | 2 |  | 2 |  | 6 |
|  | *Paromalus filum* |  |  |  |  | 1 | 1 |
|  | *Paromalus flavicornis* |  | 1 | 4 |  | 4 | 9 |
|  | *Platysoma filiforme* |  |  |  | 3 | 1 | 4 |
|  | *Teretrius parasita* |  |  |  | 1 |  | 1 |
| **Laemophloeidae** | |  |  |  |  |  |  |
|  | *Laemophloeus nigricollis* | 2 | 2 |  | 1 |  | 5 |
| **Latridiidae** |  |  |  |  |  |  |  |
|  | *Corticaria obscura* |  |  | 1 | 1 |  | 2 |
|  | *Enicmus rugosus* |  | 1 | 1 | 1 |  | 3 |
|  | *Latridius assimilis* |  |  | 2 | 1 |  | 3 |
| **Lucanidae** |  |  |  |  |  |  |  |
|  | *Dorcus parallelepipedus* | 1 | 1 | 5 | 6 | 2 | 15 |
|  | *Pseudolucanus barbarossa* | 1 | 2 |  | 1 |  | 4 |
| **Melandryidae** | |  |  |  |  |  |  |
|  | *Conopalpus brevicollis* |  |  |  | 1 | 3 | 4 |
|  | *Orchesia micans* | 2 | 1 | 1 | 1 |  | 5 |
| **Melyridae** |  |  |  |  |  |  |  |
|  | *Falsomelyris granulata* | 45 | 52 | 6 | 30 | 84 | 217 |
| **Mordellidae** | |  |  |  |  |  |  |
|  | *Hoshihananomia gacognei* | |  | 12 |  |  | 12 |
|  | *Mediimorda batteni* |  |  |  | 14 | 1 | 15 |
|  | *Mordella aculeata* |  |  |  | 1 |  | 1 |
|  | *Mordella brachyura* | 1 | 2 | 4 | 24 | 5 | 36 |
|  | *Mordella leucaspis* |  |  |  |  | 1 | 1 |
|  | *Mordellistena confinis* |  | 5 |  | 2 |  | 7 |
|  | *Mordellochroa humeralis* |  |  |  |  | 2 | 2 |
|  | *Mordellochroa humerosa* |  |  | 1 | 2 | 2 | 5 |
|  | *Variimorda fagniezi* | 6 | 2 |  | 3 |  | 11 |
|  | *Variimorda theryi* |  |  |  | 2 | 2 | 4 |
| **Mycetophagidae** | |  |  |  |  |  |  |
|  | *Litargus connexus* |  | 7 |  | 3 |  | 10 |
|  | *Mycetophagus fulvicollis* |  | 1 |  |  |  | 1 |
|  | *Mycetophagus quadriguttatus* | 9 | 6 | 6 | 2 | 2 | 25 |
| **Nitidulidae** |  |  |  |  |  |  |  |
|  | *Amphotis marginata* |  |  |  | 2 |  | 2 |
|  | *Epuraea fuscicollis* | 11 |  | 4 | 5 | 20 | 40 |
|  | *Meligethes reitteri* | 2 | 1 |  | 4 | 1 | 8 |
|  | *Soronia oblonga* | 30 | 13 | 26 | 49 | 98 | 216 |
| **Oedemeridae** | |  |  |  |  |  |  |
|  | *Ischnomera xanthoderes* | 4 | 2 | 1 | 8 |  | 15 |
|  | *Oedemera unicolor* | 1 |  |  |  |  | 1 |
| **Platypodidae** | |  |  |  |  |  |  |
|  | *Platypus cylindrus* | 3 | 1 |  | 1 | 1 | 6 |
| **Prionoceridae** | |  |  |  |  |  |  |
|  | *Lobonyx aeneus* |  | 21 |  | 4 |  | 25 |
| **Ptinidae** |  |  |  |  |  |  |  |
|  | *Dignomus dilophus* | 14 | 21 | 62 | 27 | 4 | 128 |
|  | *Dignomus irroratus* | 14 | 86 | 96 | 101 | 19 | 316 |
|  | *Dignomus lusitanus* |  |  |  | 1 |  | 1 |
|  | *Ptinus bidens* | 22 | 2 | 1 | 11 | 2 | 38 |
|  | *Ptinus hirticornis* | 14 | 15 | 58 | 22 | 68 | 177 |
|  | *Ptinus palliatus* | 1 |  | 5 | 2 | 15 | 23 |
|  | *Ptinus sp.* | 8 | 1 | 4 | 3 | 3 | 19 |
|  | *Ptinus spitzyi* | 17 | 5 | 3 | 24 | 62 | 111 |
|  | *Ptinus timidus* | 47 | 5 | 19 | 11 | 15 | 97 |
| **Salpingidae** |  |  |  |  |  |  |  |
|  | *Salpingus aeneus* |  | 1 | 1 | 2 | 9 | 13 |
|  | *Salpingus tapirus* |  |  |  |  | 1 | 1 |
| **Scraptiidae** |  |  |  |  |  |  |  |
|  | *Anaspis flava* |  |  |  |  | 2 | 2 |
|  | *Anaspis humeralis* | 1 |  |  |  | 4 | 5 |
|  | *Anaspis incognita* |  |  |  | 4 | 1 | 5 |
|  | *Anaspis lurida* |  |  |  | 1 |  | 1 |
|  | *Anaspis maculata* |  |  | 1 |  | 1 | 2 |
|  | *Anaspis regimbarti* | 2 | 4 | 5 | 2 | 27 | 40 |
|  | *Anaspis trifasciata* |  |  |  | 1 |  | 1 |
|  | *Scraptia dubia* | 7 | 37 |  | 2 | 6 | 52 |
|  | *Scraptia ophthalmica* |  | 49 | 4 | 3 |  | 56 |
|  | *Scraptia testacea* |  | 3 | 3 |  |  | 6 |
| **Silvanidae** |  |  |  |  |  |  |  |
|  | *Airaphilus elongatus* | 6 | 2 | 2 | 5 |  | 15 |
|  | *Airaphilus sp.1* | 2 |  |  |  | 2 | 4 |
|  | *Uleiota planata* |  |  |  |  | 1 | 1 |
| **Tenebrionidae** | |  |  |  |  |  |  |
|  | *Corticeus fasciatus* | 1 |  |  | 1 | 1 | 3 |
|  | *Eledonoprius armatus* |  |  |  |  | 2 | 2 |
|  | *Pentaphyllus testaceus* |  |  |  |  | 1 | 1 |
|  | *Probaticus anthracinus* | 37 | 8 | 2 | 11 | 4 | 62 |
|  | *Probaticus granulatus* |  | 2 |  |  |  | 2 |
|  | *Stenohelops sublinearis* | 34 | 4 | 5 | 24 | 22 | 89 |
|  | *Tenebrio sp.* |  | 1 | 3 | 3 | 4 | 11 |
| **Tenebrionidae (Alleculinae)** | |  |  |  |  |  |  |
|  | *Isomira hispanica* | 101 | 10 | 31 | 76 | 23 | 241 |
|  | *Mycetochara linearis* | 7 | 52 | 5 | 11 | 7 | 82 |
|  | *Mycetochara quadrimaculata* | 103 | 129 | 20 | 39 | 32 | 323 |
|  | *Prionychus fairmairei* | 2 | 4 | 38 | 19 | 13 | 76 |
|  | *Pseudocistela ceramboides* | | 3 | 12 | 3 |  | 18 |
| **Tetratomidae** | |  |  |  |  |  |  |
|  | *Tetratoma baudueri* | 1 |  | 3 | 3 | 5 | 12 |
| **Trogositidae** | |  |  |  |  |  |  |
|  | *Temnochila caerulea* | 5 |  |  |  |  | 5 |
| **Zopheridae (Colydiinae)** | |  |  |  |  |  |  |
|  | *Aulonium ruficorne* |  |  |  | 1 |  | 1 |
|  | *Colobicus hirtus* | 6 | 3 |  | 3 | 5 | 17 |
|  | *Colydium elongatum* | 1 |  |  | 6 | 4 | 11 |
|  | *Endophloeus marcovichianus* | 6 |  |  | 15 | 29 | 50 |
|  | *Synchita variegata* |  |  |  | 1 |  | 1 |
| **Total** |  | **956** | **1142** | **1142** | **1178** | **1247** | **5665** |

*Red listed species in Spain and Europe was detailed at first column. Threatened status follows UICN criteria VU= Vulnerable, EN= Endangered (see Nieto & Alexander 2010; Verdú et al. 2011).
